# Supplementary material for: Soil Microbial Diversity and Community Composition in Rice–Fish Co-Culture and Rice Monoculture Farming System
Source: MDPI journal article supplement (doi:10.3390/biology11081242), 2022-08-20
Supplement: s1 [file s1]

## Supplementary Materials

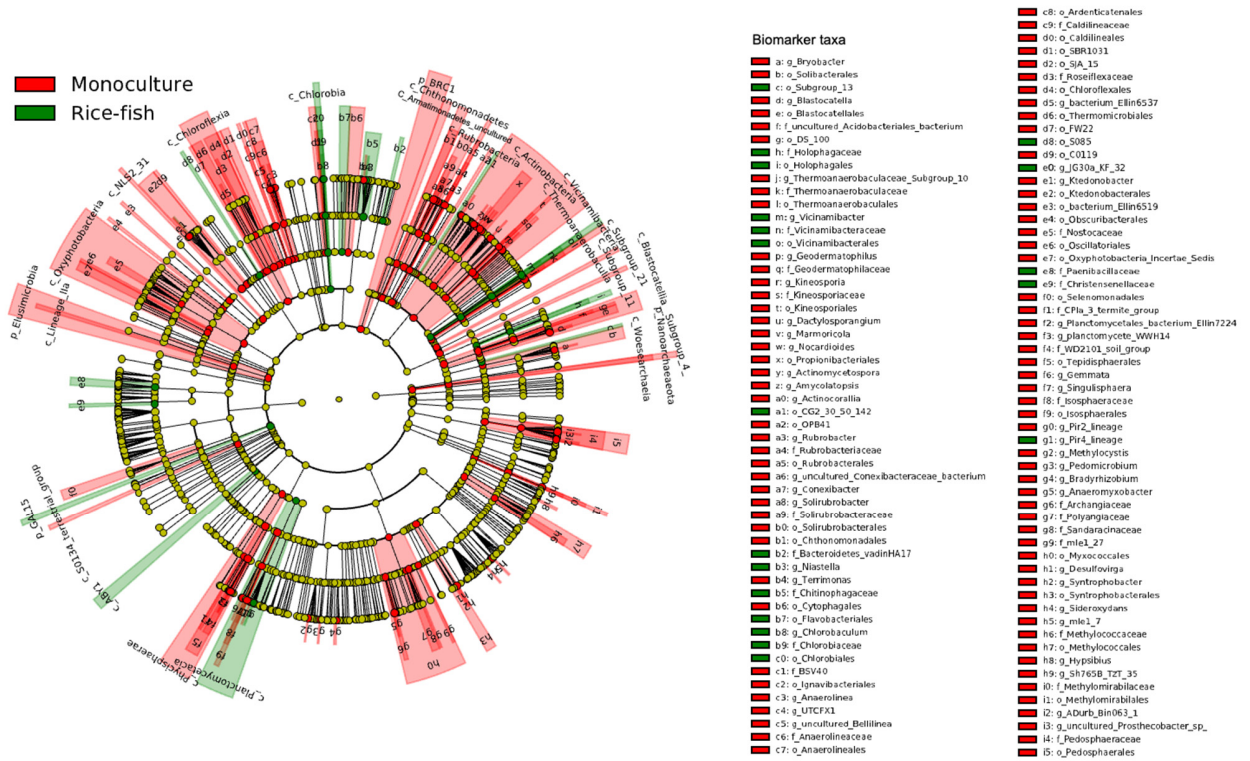

**Figure S1** LEfSE analysis from phylum to genus level. Cladogram shows differential abundance taxa ( $p > 0.05$ , LDA score  $\geq 2$ ) among monoculture rice fields and rice-fish co-culture fields. Taxa in red are significantly enriched in the monoculture, whereas taxa in green are significant enriched in the rice-fish field.

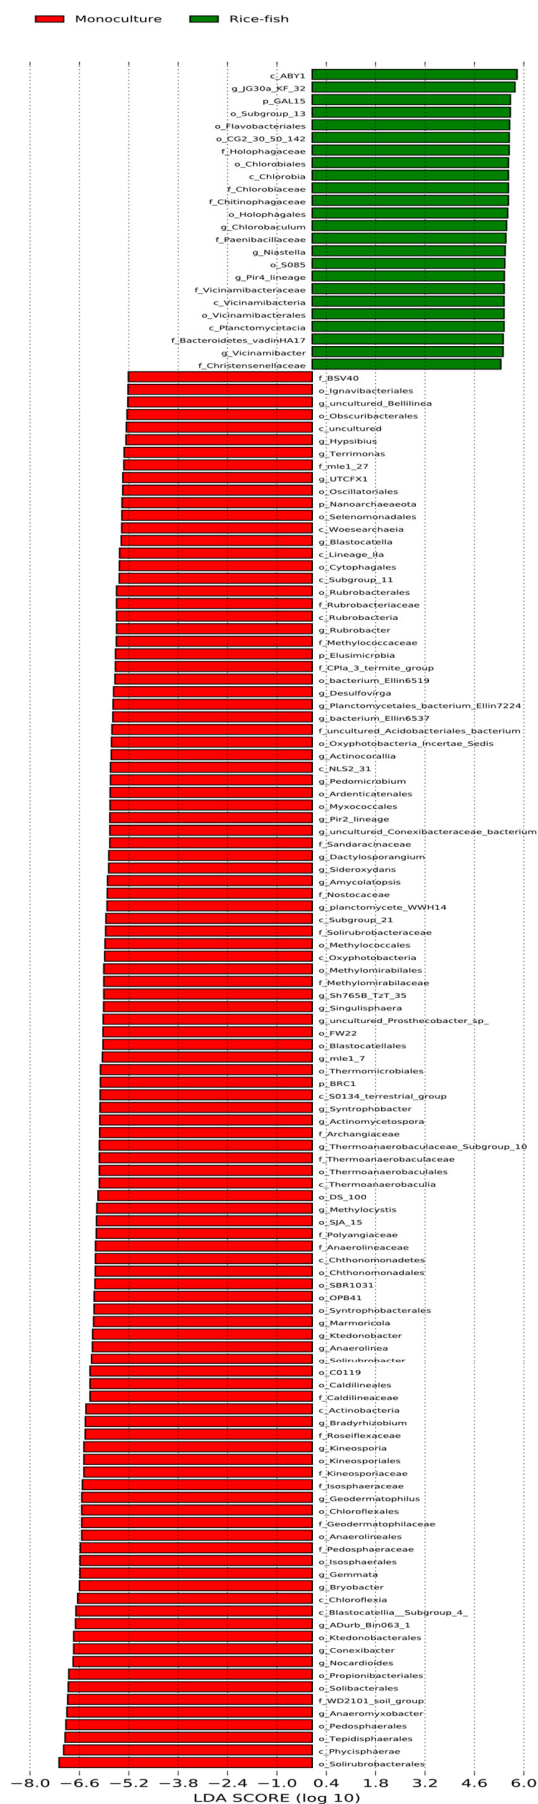

**Figure S2** Bar plot shows differential abundance taxa with effect size (LDA score). Taxa in red are significantly enriched in the monoculture, whereas taxa in green are significantly enriched in the rice-fish field.
